# Supplementary material for: Service Chains’ Operational Strategies: Standardization or Customization? Evidence from the Nursing Home Industry
Source: Atypon-hosted journal article supplement (doi:10.1287/msom.2022.1111), 2022-04-21
Supplement: msom.2022.1111.sm1.pdf [file msom.2022.1111.sm1.pdf]

Authors are encouraged to submit new papers to INFORMS journals by means of a style file template, which includes the journal title. However, use of a template does not certify that the paper has been accepted for publication in the named journal. INFORMS journal templates are for the exclusive purpose of submitting to an INFORMS journal and should not be used to distribute the papers in print or online or to submit the papers to another publication.

# Online Supplements - Service Chains' Operational Strategies: Standardization or Customization? Evidence from the Nursing Home Industry

Lu Kong

Muma College of Business, University of South Florida, Tampa, FL 33620, kongl@usf.edu

Kejia Hu

Owen Graduate School of Management, Vanderbilt University, Nashville, TN 37235, kejia.hu@vanderbilt.edu

Rohit Verma

VinUniversity, Hanoi, Vietnam & Cornell University, Ithaca, NY 14850, rohit.verma@cornell.edu

---

## 1. Control Variables

1. Local market-level characteristics: local market heterogeneity not only affects the three nursing home outcomes we explore, but also contributes to DoS decisions within a chain. To account for the influence of the local market, we add several location-level control variables and fixed effects:

(a) Average CM, SO, and SD for the local market each year. The base level of these variables may influence nursing home performance outcomes, independently of standardization strategies. Controlling these baseline variables helps disentangle location-specific variances from the general effects of deviation from the chain norm.

(b) The total number of nursing homes in the market each year. The number of local competitors can influence decisions about organization structures and performance outcomes (Castle et al. 2007).

(c) Market-level senior population, number of registered nurses, and average household income. The number of target customers, availability of labor, and local economic status of a location can influence the nursing home performance outcomes we explore.

(d) Location-level fixed effects. Adding location-level fixed effects soaks up systematic differences between markets that are time-invariant. We use Health Service Area (HSA) as a market/location level indicator in our analysis. The National Center for Health Statistics (part of the CDC) defines a health service area as one single county or cluster of contiguous counties that is relatively self-contained in terms of healthcare resources such as hospital care. The reasons we use HSA to define market level rather than other geographic regions, such as state, county, and zip code, are:

(d.1) The origination of HSA. The 805 HSAs are aggregated from counties by a cluster analysis of where the residents aged 65 years and over obtain their routine care. Since people frequently travel outside their counties and zip codes of residence for care, we argue that HSA as a geographic unit better captures the local market's population characteristics than state and county (especially in the context of our study, since the majority of nursing home customers are seniors).

(d.2) The measure of between-market variance. We argue that using the state as a local market indicator may mask interesting microlocal variations in the data, whereas county or zip code could exaggerate the between-market variances. The 805 HSAs are a well-defined compromise (in terms of size and number) between the 3,141 counties and 50 states.

2. Size: the number of facilities in a chain and the number of beds in a facility each year. The structure and outcomes of organizations are often contingent on size (Curry and Ratliff 1973).

3. Resident acuity level: resident average Activities of Daily Living (ADL) score and the average Resource Utilization Group Nursing Case Mix Index (RUGCMI) in each facility in each year. The average acuity level of residents affects the average level of care needed, and thus can be associated with multiple operational outcomes.

4. Staffing level: registered nurse hours per resident day in each facility each year. Staffing level is proven to be associated with clinical outcomes (Harrington et al. 2016) and nursing home costs.

5. Costs and occupancy: total costs and occupancy of each facility each year. Costs and occupancy can be associated with financial performance and resident welfare.

6. Property type: whether the focal facility is profit-based or hospital-based. Property type is found to be associated with various nursing home outcomes (Comondore et al. 2009).

7. Year fixed effects are added to capture unobservable effects that are time-variant.

8. Chain fixed effects are included in the model to account for time-invariant variance at the chain level, which may influence performance outcomes.

## 2. Table: Descriptive Analysis of Chains

**Table 1** Descriptive Analysis of Chains

| Chain Attributes                 | Criteria                                                        | Numbers |
|----------------------------------|-----------------------------------------------------------------|---------|
| <i>Chain Size by Facilities</i>  | The Largest Chain                                               | 104     |
|                                  | The Smallest Chain                                              | 3       |
|                                  | Average Chain Size                                              | 10      |
|                                  | Number of Large Chains ( $\geq 20$ Facilities)                  | 15      |
|                                  | Number of Small Chains ( $\leq 3$ Facilities)                   | 39      |
| <i>Chain Size by Total Beds</i>  | The Largest Chain                                               | 10,748  |
|                                  | The Smallest Chain                                              | 123     |
|                                  | Average Chain Size                                              | 1,124.2 |
|                                  | Number of Large Chains ( $\geq 2000$ Beds)                      | 23      |
|                                  | Number of Small Chains ( $\leq 300$ Beds)                       | 18      |
| <i>Chain Geographic Coverage</i> | Number of Chains Operating in Only One State                    | 74      |
|                                  | Number of Chains Operating in Multiple States                   | 118     |
| <i>Chain Types</i>               | Number of Chains with Only For-profit Facilities                | 154     |
|                                  | Number of Chains with Only Non-profit Facilities                | 17      |
|                                  | Number of Chains with Both For-profit and Non-profit Facilities | 21      |

## 3. Table: Correlations of Variables Used in Models

Table 2 Correlations of Variables Used in Models

| Variable                              | 1      | 2      | 3      | 4      | 5      | 6      | 7      | 8      | 9      | 10     | 11     | 12     | 13     | 14     | 15     | 16     | 17     | 18    | 19     | 20    | 21    | 22    |  |
|---------------------------------------|--------|--------|--------|--------|--------|--------|--------|--------|--------|--------|--------|--------|--------|--------|--------|--------|--------|-------|--------|-------|-------|-------|--|
| 1. Operating Margin                   | 1.000  |        |        |        |        |        |        |        |        |        |        |        |        |        |        |        |        |       |        |       |       |       |  |
| 2. Clinical Outcome                   | -0.112 | 1.000  |        |        |        |        |        |        |        |        |        |        |        |        |        |        |        |       |        |       |       |       |  |
| 3. Resident Welfare                   | -0.059 | 0.379  | 1.000  |        |        |        |        |        |        |        |        |        |        |        |        |        |        |       |        |       |       |       |  |
| 4. DoS in Service Offering            | -0.001 | 0.034  | -0.004 | 1.000  |        |        |        |        |        |        |        |        |        |        |        |        |        |       |        |       |       |       |  |
| 5. DoS in Service Delivery            | 0.008  | -0.034 | 0.021  | -0.006 | 1.000  |        |        |        |        |        |        |        |        |        |        |        |        |       |        |       |       |       |  |
| 6. DoS in Customer Mix                | 0.150  | -0.041 | 0.021  | -0.005 | 0.029  | 1.000  |        |        |        |        |        |        |        |        |        |        |        |       |        |       |       |       |  |
| 7. Number of Facilities in Chain      | -0.038 | -0.002 | -0.022 | -0.078 | 0.019  | 0.047  | 1.000  |        |        |        |        |        |        |        |        |        |        |       |        |       |       |       |  |
| 8. Average ADL                        | 0.081  | -0.077 | -0.023 | 0.022  | 0.099  | -0.068 | -0.022 | 1.000  |        |        |        |        |        |        |        |        |        |       |        |       |       |       |  |
| 9. Average RUGCM1                     | -0.061 | 0.010  | -0.049 | 0.012  | 0.133  | -0.069 | 0.090  | 0.406  | 1.000  |        |        |        |        |        |        |        |        |       |        |       |       |       |  |
| 10. Registered Nurse Hours            | -0.078 | -0.009 | -0.015 | 0.003  | -0.017 | -0.158 | 0.123  | 0.196  | 0.406  | 1.000  |        |        |        |        |        |        |        |       |        |       |       |       |  |
| 11. Number of Beds in Facility        | 0.067  | -0.243 | 0.121  | -0.114 | 0.065  | 0.078  | -0.040 | 0.130  | 0.054  | -0.001 | 1.000  |        |        |        |        |        |        |       |        |       |       |       |  |
| 12. Market Average Service Offering   | -0.022 | -0.057 | 0.030  | -0.301 | 0.020  | 0.006  | 0.097  | -0.127 | -0.102 | 0.026  | 0.051  | 1.000  |        |        |        |        |        |       |        |       |       |       |  |
| 13. Market Average Service Delivery   | -0.075 | -0.012 | 0.035  | 0.017  | -0.130 | -0.122 | 0.002  | 0.310  | 0.432  | 0.497  | 0.070  | -0.038 | 1.000  |        |        |        |        |       |        |       |       |       |  |
| 14. Market Average Customer Mix       | 0.011  | -0.008 | -0.012 | -0.014 | -0.019 | 0.242  | 0.013  | -0.067 | -0.044 | -0.194 | 0.052  | -0.056 | -0.260 | 1.000  |        |        |        |       |        |       |       |       |  |
| 15. Cost                              | -0.411 | 0.022  | -0.026 | 0.011  | -0.008 | -0.119 | -0.024 | 0.001  | 0.024  | 0.073  | -0.073 | 0.021  | 0.046  | -0.045 | 1.000  |        |        |       |        |       |       |       |  |
| 16. Occupancy                         | 0.204  | -0.210 | -0.036 | 0.007  | 0.092  | 0.018  | 0.093  | 0.208  | 0.001  | 0.053  | -0.014 | 0.019  | 0.107  | -0.073 | 0.012  | 1.000  |        |       |        |       |       |       |  |
| 17. Number of Facilities in Market    | -0.043 | -0.065 | 0.034  | 0.025  | 0.028  | -0.100 | -0.051 | 0.108  | 0.064  | 0.188  | 0.240  | 0.040  | 0.150  | -0.115 | 0.028  | 0.019  | 1.000  |       |        |       |       |       |  |
| 18. For-profit                        | 0.158  | -0.033 | 0.030  | -0.008 | 0.019  | 0.068  | 0.030  | 0.110  | 0.101  | 0.010  | 0.168  | -0.081 | 0.070  | 0.177  | -0.146 | -0.030 | 0.042  | 1.000 |        |       |       |       |  |
| 19. Hospital-based                    | 0.003  | -0.004 | 0.007  | -0.009 | 0.009  | -0.005 | 0.017  | -0.001 | 0.020  | 0.035  | 0.001  | 0.014  | 0.021  | 0.000  | -0.002 | 0.000  | -0.015 | 0.008 | 1.000  |       |       |       |  |
| 20. Local Income                      | -0.022 | -0.035 | 0.080  | 0.005  | 0.055  | -0.097 | 0.039  | 0.158  | 0.158  | 0.302  | 0.178  | 0.015  | 0.272  | -0.229 | 0.024  | 0.100  | 0.397  | 0.024 | 0.005  | 1.000 |       |       |  |
| 21. Local Senior Population           | -0.008 | -0.016 | 0.081  | 0.042  | 0.031  | -0.102 | -0.103 | 0.220  | 0.123  | 0.137  | 0.195  | -0.051 | 0.212  | -0.129 | 0.008  | 0.041  | 0.510  | 0.089 | -0.006 | 0.224 | 1.000 |       |  |
| 22. Local Number of Registered Nurses | 0.012  | 0.017  | -0.022 | 0.018  | -0.021 | -0.038 | -0.133 | 0.185  | 0.116  | -0.061 | 0.136  | -0.182 | 0.075  | 0.065  | -0.009 | -0.065 | 0.213  | 0.151 | -0.014 | 0.107 | 0.403 | 1.000 |  |

## 4. Tests and Validation for Choice of Instrumental Variables

We adopt an instrumental variable (IV) two-stage least squares (2SLS) approach, using lagged endogenous variables as IVs in our models. Despite its popularity, this approach is subject to some criticism. For example, Bellemare et al. (2017) find that lagging independent variables may lead to rejections of null hypotheses that are true; and this approach oftentimes (except when endogeneity threats and persistence in the unobservables are both small) generates estimations that are no better than simply ignoring the endogeneity. To guide proper use of this analysis approach, Bellemare et al. (2017) specify several conditions under which lagged explanatory variables are appropriate IVs in addressing endogeneity concerns. In this section, we validate to the extent possible that our analysis meets the conditions specified, and provide tests and results to support our choice of IVs.

### 4.1. The Relevance and Exclusion Conditions of IVs

In the nursing home industry, CMS's annual inspection provides valuable feedback to each nursing home, which is later used to adjust operating strategies for the following year. Thus, the yearly lagged explanatory variables should be correlated with the explanatory variables in the current year. This satisfies the "relevance" requirement of the IV approach. We test these hypothesized correlations with our first stage model, and the results (shown in Table 3) support our hypotheses.

Also, we assume the lagged explanatory variables are uncorrelated with the error terms, since the operational decisions in year  $(t - 1)$  should not determine the unobserved factors of operating outcomes in year  $(t + 1)$ . This satisfies the "exclusion restriction" requirement of the IV approach. With evidence from simulations, Reed (2015) suggests that using lagged values of the endogenous variables as IVs is valid when (1) the IVs do not themselves belong in the respective estimating equation, and (2) the IVs are significantly correlated with the endogenous variables. Both of these requirements are met in our analysis.

### 4.2. Using Lagged Explanatory Variables as IVs

In their paper, Bellemare et al. (2017) specify several conditions; when satisfied, each of these conditions can independently justify the use of lagged explanatory variables as IVs. One of these conditions (condition 2a in the paper) has several requirements: (1) there is no unobserved confounding; (2) reverse causality does not exist ( $Y \nrightarrow X$ ); (3) the causal effect only operates through the lagged explanatory variables ( $X_{t-1} \rightarrow Y$  but  $X_t \nrightarrow Y$ ). Since we add to our model a considerable amount of relevant control variables at the facility, chain, and market level, along with the chain, market, and year fixed effects, we argue that there is no unobserved confounding in our analysis. We then test for requirements (2) and (3). As stated in Section 4.2 of the main text, we

use outcome variables in year  $(t + 1)$  and explanatory variables (DoS in CM, SO, and SD) in year  $(t)$  before we justify our choice of IVs.

We first test for reverse causality. We regress each endogenous explanatory variable in year  $(t)$  on all outcome variables in our analysis, including operating margin, clinical outcome, and resident welfare. The control variables and fixed effects in equation (10) are also included in the reverse causality models. The results are shown in Table 4. As none of the outcome variables is significantly associated with any of the explanatory variables, we conclude that reverse causality does not exist in our analysis.

We then test if the causal effect only operates through the lagged explanatory variables ( $X_{t-1}$ ), but not through the explanatory variables in year  $(t)$  ( $X_t$ ). We regress the outcome variables on  $X_t$  and  $X_{t-1}$ , respectively; the control variables and fixed effects in equation (10) are also included in these models. The results are shown in Table 5 and Table 6. As indicated in Table 5, except for DoS in customer mix (significantly associated with operating margin), no other explanatory variable in year  $(t)$  is significantly associated with any outcome variables. Hence, out of nine hypothesized relationships (three explanatory variables times three outcome variables), eight satisfy the condition specified in the Bellemare et al. (2017) paper. Meanwhile, Table 6 exhibits several significant relationships between the lagged explanatory variables ( $X_{t-1}$ ) and the outcome variables. Thus, we argue that in our analysis, the condition specified by Bellemare et al. (2017) is met to a sufficient extent to justify using lagged explanatory variables as IVs.

### 4.3. Models without IVs

To help readers better understand the direction and magnitude of the biases and the impact of the instrumental variable analysis itself, we present the results of models without instrumental variables in Table 7. Results indicate that several important findings are masked in models without instrumental variables, such as the significant relationship between DoS in customer mix and clinical outcome, and the marginally significant relationship between DoS in service delivery and resident welfare. Also worth noticing is that the IV models lose observations from lagging variables, but they also have higher adjusted  $R^2$  than the models without IVs.

**Table 3 First Stage Model Results 1**

|                                                | First Stage Model 1<br>Service Offering | First Stage Model 2<br>Service Delivery | First Stage Model 3<br>Customer Mix |
|------------------------------------------------|-----------------------------------------|-----------------------------------------|-------------------------------------|
| Constant                                       | -1880.0000<br>(1400.0000)               | -6290.0000***<br>(299.0000)             | -1700.0000***<br>(168.0000)         |
| <i>Explanatory Variables</i>                   |                                         |                                         |                                     |
| Lagged Service Offering                        | 5680.0000***<br>(63.0000)               | -<br>-                                  | -<br>-                              |
| Lagged Service Delivery                        | -<br>-                                  | 4250.0000***<br>(63.8000)               | -<br>-                              |
| Lagged Customer Mix                            | -<br>-                                  | -<br>-                                  | 7400.0000***<br>(47.0000)           |
| <i>Facility-Level Control Variables</i>        |                                         |                                         |                                     |
| Average ADL                                    | -103.0000<br>(55.2000)                  | 16.2000<br>(11.5000)                    | -0.7150<br>(6.5700)                 |
| Average RUGCMI                                 | 1150.0000<br>(1370.0000)                | 1360.0000***<br>(287.0000)              | -234.0000<br>(163.0000)             |
| Registered Nurse Hours                         | -399.0000<br>(464.0000)                 | -1370.0000***<br>(97.0000)              | -278.0000***<br>(55.3000)           |
| Number of Beds in Facility                     | -17.2000***<br>(2.3900)                 | 1.2100*<br>(0.4970)                     | 0.8970**<br>(0.2840)                |
| Occupancy                                      | 0.8300<br>(7.4400)                      | 10.5000***<br>(1.5600)                  | 3.5200***<br>(0.8860)               |
| For-profit                                     | -33.3000<br>(343.0000)                  | 50.6000<br>(71.6000)                    | 129.0000**<br>(40.8000)             |
| Hospital-based                                 | -232.0000<br>(4790.0000)                | 751.0000<br>(1000.0000)                 | 97.3000<br>(570.0000)               |
| Cost                                           | 0.0032<br>(0.0061)                      | -0.0008<br>(0.0013)                     | -0.0045***<br>(0.0007)              |
| <i>Chain-Level Control Variables</i>           |                                         |                                         |                                     |
| Number of Facilities in Chain                  | -4.6100**<br>(1.4200)                   | 0.4110<br>(0.2950)                      | 0.3840*<br>(0.1680)                 |
| <i>Location/Market-Level Control Variables</i> |                                         |                                         |                                     |
| Market Average Service Offering                | -12700.0000***<br>(453.0000)            | 153.0000<br>(91.8000)                   | 77.3000<br>(52.3000)                |
| Market Average Service Delivery                | 561.0000<br>(421.0000)                  | 878.0000***<br>(88.1000)                | -7.6400<br>(50.1000)                |
| Market Average Customer Mix                    | -2.3200<br>(10.2000)                    | 1.8600<br>(2.1200)                      | 14.1000***<br>(1.2300)              |
| Number of Facilities in Market                 | 51.9000***<br>(13.7000)                 | 4.7600<br>(2.8500)                      | -2.0200<br>(1.6300)                 |
| Local Income                                   | 0.0072<br>(0.0088)                      | 0.0051**<br>(0.0018)                    | 0.0015<br>(0.0011)                  |
| Local Senior Population                        | 0.0014<br>(0.0009)                      | 0.0002<br>(0.0002)                      | -0.0003**<br>(0.0001)               |
| Local Number of Registered Nurses              | -0.0079***<br>(0.0019)                  | -0.0024***<br>(0.0004)                  | -0.0002<br>(0.0002)                 |
| Year Fixed Effect                              | Yes                                     | Yes                                     | Yes                                 |
| $R^2$                                          | 0.3842                                  | 0.2391                                  | 0.6188                              |
| Adjusted $R^2$                                 | 0.3834                                  | 0.2380                                  | 0.6183                              |
| Degree of Freedom                              | 18322                                   | 18312                                   | 18322                               |
| F-statistic                                    | 457.3***                                | 230.1***                                | 1190***                             |

Notes. The reported coefficients and standard errors were multiplied by  $10^4$

.  $p < 0.1$ ; \*  $p < 0.05$ ; \*\*  $p < 0.01$ ; \*\*\*  $p < 0.001$

**Table 4 Reverse Causality Models ( $Y \rightarrow X_t$ )**

|                                     | Model 1<br>Service Offering | Model 2<br>Service Delivery | Model 3<br>Customer Mix |
|-------------------------------------|-----------------------------|-----------------------------|-------------------------|
| Operating Margin                    | Insignificant (p= 0.35)     | Insignificant (p= 0.29)     | Insignificant (p= 0.21) |
| Clinical Outcome                    | Insignificant (p= 0.35)     | Insignificant (p= 0.21)     | Insignificant (p= 0.85) |
| Resident Welfare                    | Insignificant (p= 0.17)     | Insignificant (p= 0.88)     | Insignificant (p= 0.61) |
| Facility-Level Control Variables    | Yes                         | Yes                         | Yes                     |
| Chain-Level Control Variables       | Yes                         | Yes                         | Yes                     |
| Year Fixed Effect                   | Yes                         | Yes                         | Yes                     |
| Chain-Level Fixed Effects           | Yes                         | Yes                         | Yes                     |
| Location/Market-Level Fixed Effects | Yes                         | Yes                         | Yes                     |
| $R^2$                               | 0.2748                      | 0.2241                      | 0.4959                  |

**Table 5 Explanatory Variables and Outcome Variables ( $X_t \rightarrow Y$ )**

|                                     | Model 1<br>Operating Margin  | Model 2<br>Clinical Outcome | Model 3<br>Resident Welfare |
|-------------------------------------|------------------------------|-----------------------------|-----------------------------|
| DoS in Service Offering             | Insignificant (p= 0.27)      | Insignificant (p= 0.81)     | Insignificant (p= 0.19)     |
| DoS in Service Delivery             | Insignificant (p= 0.10)      | Insignificant (p= 0.19)     | Insignificant (p= 0.78)     |
| DoS in Customer Mix                 | <b>Significant</b> (p= 0.00) | Insignificant (p= 0.76)     | Insignificant (p= 0.82)     |
| Facility-Level Control Variables    | Yes                          | Yes                         | Yes                         |
| Chain-Level Control Variables       | Yes                          | Yes                         | Yes                         |
| Year Fixed Effect                   | Yes                          | Yes                         | Yes                         |
| Chain-Level Fixed Effects           | Yes                          | Yes                         | Yes                         |
| Location/Market-Level Fixed Effects | Yes                          | Yes                         | Yes                         |
| $R^2$                               | 0.3793                       | 0.2562                      | 0.2952                      |

**Table 6 One-Period Lagged Explanatory Variables and Outcome Variables ( $X_{t-1} \rightarrow Y$ )**

|                                     | Model 1<br>Operating Margin  | Model 2<br>Clinical Outcome  | Model 3<br>Resident Welfare  |
|-------------------------------------|------------------------------|------------------------------|------------------------------|
| Lagged DoS in Service Offering      | Insignificant (p= 0.43)      | Insignificant (p= 0.70)      | Insignificant (p= 0.42)      |
| Lagged DoS in Service Delivery      | <b>Significant</b> (p= 0.03) | Insignificant (p= 0.63)      | <b>Significant</b> (p= 0.06) |
| Lagged DoS in Customer Mix          | <b>Significant</b> (p= 0.00) | <b>Significant</b> (p= 0.02) | Insignificant (p= 0.70)      |
| Facility-Level Control Variables    | Yes                          | Yes                          | Yes                          |
| Chain-Level Control Variables       | Yes                          | Yes                          | Yes                          |
| Year Fixed Effect                   | Yes                          | Yes                          | Yes                          |
| Chain-Level Fixed Effects           | Yes                          | Yes                          | Yes                          |
| Location/Market-Level Fixed Effects | Yes                          | Yes                          | Yes                          |
| $R^2$                               | 0.4017                       | 0.2753                       | 0.3038                       |

**Table 7 Models without Instrumental Variables**

|                                                | Model 1<br>Operating Margin | Model 2<br>Clinical Outcome | Model 3<br>Resident Welfare   |
|------------------------------------------------|-----------------------------|-----------------------------|-------------------------------|
| Constant                                       | -2474.0000***<br>(681.2000) | 351.4000***<br>(91.3800)    | 61440.0000**<br>(22590.0000)  |
| <i>Explanatory Variables</i>                   |                             |                             |                               |
| DoS in Service Offering                        | -6.9630<br>(6.3190)         | -0.2075<br>(0.8476)         | 272.6000<br>(209.5000)        |
| DoS in Service Delivery                        | -50.0000.<br>(30.2900)      | -5.3100<br>(4.0640)         | -279.7000<br>(1004.0000)      |
| DoS in Customer Mix                            | 172.6000***<br>(47.1900)    | -1.9710<br>(6.3300)         | 360.0000<br>(1565.0000)       |
| <i>Facility-Level Control Variables</i>        |                             |                             |                               |
| Average ADL                                    | 26.6400***<br>(6.0310)      | -0.2825<br>(0.8094)         | 202.0000<br>(200.0000)        |
| Average RUGCMI                                 | 375.6000*<br>(152.2000)     | 17.4300<br>(20.4300)        | -4662.0000<br>(5048.0000)     |
| Registered Nurse Hours                         | -68.2100<br>(56.4100)       | -19.1600*<br>(7.5690)       | -10580.0000***<br>(1870.0000) |
| Number of Beds in Facility                     | 2.2120***<br>(0.2874)       | -0.7838***<br>(0.0386)      | 149.3000***<br>(9.5310)       |
| Occupancy                                      | 20.6200***<br>(0.9668)      | -2.0250***<br>(0.1297)      | -128.5000***<br>(32.0600)     |
| For-profit                                     | 884.6000***<br>(91.6200)    | 15.2500<br>(12.3200)        | 3959.0000<br>(3038.0000)      |
| Hospital-based                                 | 970.8000*<br>(438.2000)     | -124.6000*<br>(58.7900)     | -46850.0000**<br>(14530.0000) |
| Cost                                           | -0.0210***<br>(0.0008)      | 0.0000<br>(0.0001)          | -0.0245<br>(0.0272)           |
| <i>Chain-Level Control Variables</i>           |                             |                             |                               |
| Number of Facilities in Chain                  | -3.0730***<br>(0.5726)      | -0.0397<br>(0.0768)         | 70.6200***<br>(18.9900)       |
| <i>Location/Market-Level Control Variables</i> |                             |                             |                               |
| Market Average Service Offering                | -164.4000*<br>(72.5800)     | -2.8010<br>(9.7370)         | 125.7000<br>(2407.0000)       |
| Market Average Service Delivery                | 40.4300<br>(54.7600)        | -14.4200*<br>(7.3470)       | -341.9000<br>(1816.0000)      |
| Market Average Customer Mix                    | -1.6380<br>(1.8140)         | -0.4282.<br>(0.2434)        | -52.3900<br>(60.1600)         |
| Number of Facilities in Market                 | -7.6690<br>(5.1100)         | 0.1014<br>(0.6856)          | 19.0700<br>(169.4000)         |
| Local Income                                   | 0.0005<br>(0.0015)          | 0.0000<br>(0.0002)          | 0.0342<br>(0.0507)            |
| Local Senior Population                        | -0.0005*<br>(0.0002)        | 0.0000<br>(0.0000)          | 0.0233***<br>(0.0070)         |
| Local Number of Registered Nurses              | -0.0032<br>(0.0023)         | 0.0002<br>(0.0003)          | 0.0842<br>(0.0753)            |
| <i>Fixed Effects</i>                           |                             |                             |                               |
| Year Fixed Effect                              | Yes                         | Yes                         | Yes                           |
| Chain-Level Fixed Effects                      | Yes                         | Yes                         | Yes                           |
| Location/Market-Level Fixed Effects            | Yes                         | Yes                         | Yes                           |
| $R^2$                                          | 0.3793                      | 0.2562                      | 0.2952                        |
| Adjusted $R^2$                                 | 0.3466                      | 0.2171                      | 0.2581                        |
| Degree of Freedom                              | 17387                       | 17381                       | 17387                         |
| F-statistic                                    | 11.62***                    | 6.551***                    | 7.967***                      |

Notes. The reported coefficients and standard errors were multiplied by  $10^4$

. $p < 0.1$ ; \* $p < 0.05$ ; \*\* $p < 0.01$ ; \*\*\* $p < 0.001$

## References

- Bellemare MF, Masaki T, Pepinsky TB (2017) Lagged explanatory variables and the estimation of causal effect. *The Journal of Politics* 79(3):949–963.
- Castle NG, Engberg J, Liu D (2007) Have nursing home compare quality measure scores changed over time in response to competition? *BMJ Quality & Safety* 16(3):185–191.
- Comondore VR, Devereaux P, Zhou Q, Stone SB, Busse JW, Ravindran NC, Burns KE, Haines T, Stringer B, Cook DJ, et al. (2009) Quality of care in for-profit and not-for-profit nursing homes: systematic review and meta-analysis. *BMJ* 339(b2732).
- Curry TJ, Ratliff BW (1973) The effects of nursing home size on resident isolation and life satisfaction. *The Gerontologist* 13(3\_Part\_1):295–298.
- Harrington C, Schnelle JF, McGregor M, Simmons SF (2016) Article commentary: The need for higher minimum staffing standards in us nursing homes. *Health Services Insights* 9:13–19.
- Reed WR (2015) On the practice of lagging variables to avoid simultaneity. *Oxford Bulletin of Economics and Statistics* 77(6):897–905.
